# Supplementary material
Source: MDPI journal article supplement (https://www.mdpi.com/2073-4395/13/4/1074)
Supplement: s1 [file s1]

# Supplementary files

**Table S1.** Growing media (Peat, *O. dubium* residue -ODR) physicochemical properties after plant harvesting (at the end of the growing period).

|                    | Peat 100%     | ODR 5%         | ODR 10%        | ODR 20%        | ODR 40%       |
|--------------------|---------------|----------------|----------------|----------------|---------------|
| pH                 | 6.55 ± 0.04c  | 6.63 ± 0.09c   | 6.87 ± 0.06b   | 7.11 ± 0.08a   | 7.23 ± 0.01a  |
| EC (mS/cm)         | 1.15 ± 0.11a  | 1.12 ± 0.08b   | 1.31 ± 0.12ab  | 1.15 ± 0.24b   | 1.24 ± 0.08ab |
| Organic matter (%) | 75.90 ± 1.87b | 76.81 ± 4.34ab | 74.60 ± 2.62b  | 77.59 ± 1.27ab | 81.20 ± 1.91a |
| Organic C (%)      | 44.03 ± 1.08b | 44.55 ± 2.52ab | 43.27 ± 1.52b  | 45.01 ± 0.73ab | 47.10 ± 1.11a |
| C/N ratio          | 52.72 ± 4.28a | 52.89 ± 7.79a  | 46.56 ± 2.94ab | 39.38 ± 2.82b  | 51.20 ± 3.62a |
| N (g/kg)           | 8.37 ± 0.49b  | 8.51 ± 0.96b   | 9.30 ± 0.27b   | 11.47 ± 0.98a  | 9.22 ± 0.57b  |
| K (g/kg)           | 3.22 ± 0.37b  | 3.56 ± 0.27b   | 4.55 ± 0.18a   | 4.80 ± 0.53a   | 4.42 ± 0.15a  |
| P (g/kg)           | 2.50 ± 0.42a  | 1.37 ± 0.07c   | 2.09 ± 0.27b   | 1.97 ± 0.58abc | 1.69 ± 0.28bc |
| Ca (g/kg)          | 20.33 ± 1.45a | 17.60 ± 1.50b  | 18.50 ± 0.96ab | 20.55 ± 1.99a  | 14.93 ± 0.87c |
| Mg (g/kg)          | 1.48 ± 0.14c  | 1.56 ± 0.12bc  | 1.78 ± 0.06b   | 2.29 ± 0.24a   | 2.24 ± 0.12a  |
| Na (g/kg)          | 2.73 ± 0.38b  | 3.14 ± 0.17a   | 2.78 ± 0.01ab  | 2.97 ± 0.05ab  | 2.33 ± 0.06c  |

Values are mean ± SD (n = 4). In each row, values followed by the same letter do not differ significantly at P<0.05.

**Table S2.** Growing media (Peat, *S. cypria* residue -SCR) physicochemical properties after plant harvesting (at the end of the growing period).

|                    | Peat 100%     | SCR 5%        | SCR 10%        | SCR 20%        | SCR 40%       |
|--------------------|---------------|---------------|----------------|----------------|---------------|
| pH                 | 6.55 ± 0.04d  | 6.60 ± 0.10d  | 6.76 ± 0.02c   | 7.18 ± 0.07b   | 8.21 ± 0.08a  |
| EC (mS/cm)         | 1.15 ± 0.11a  | 1.01 ± 0.05b  | 1.30 ± 0.05ab  | 1.37 ± 0.40ab  | 1.15 ± 0.28ab |
| Organic matter (%) | 75.90 ± 1.87  | 76.10 ± 3.20  | 73.53 ± 1.96   | 77.96 ± 4.41   | 78.88 ± 1.35  |
| Organic C (%)      | 44.03 ± 1.08  | 44.14 ± 1.86  | 42.65 ± 1.14   | 45.22 ± 2.56   | 45.75 ± 0.78  |
| C/N ratio          | 52.72 ± 4.28a | 52.87 ± 1.88a | 47.45 ± 2.93ab | 43.79 ± 5.93bc | 38.54 ± 2.31c |
| N (g/kg)           | 8.37 ± 0.49c  | 8.36 ± 0.56c  | 9.00 ± 0.48c   | 10.40 ± 0.91b  | 11.90 ± 0.84a |
| K (g/kg)           | 3.22 ± 0.37b  | 3.04 ± 0.20b  | 3.95 ± 0.89b   | 4.04 ± 0.78b   | 8.08 ± 0.55a  |
| P (g/kg)           | 2.50 ± 0.42a  | 1.42 ± 0.29b  | 1.64 ± 0.32b   | 1.63 ± 0.11b   | 1.48 ± 0.13b  |
| Ca (g/kg)          | 20.33 ± 1.45  | 19.64 ± 0.18  | 20.75 ± 1.62   | 20.39 ± 0.88   | 20.14 ± 0.95  |
| Mg (g/kg)          | 1.48 ± 0.14c  | 1.46 ± 0.01c  | 1.78 ± 0.19b   | 1.75 ± 0.02b   | 2.43 ± 0.06a  |
| Na (g/kg)          | 2.73 ± 0.38b  | 2.67 ± 0.12b  | 3.18 ± 0.73b   | 2.76 ± 0.46b   | 4.13 ± 0.23a  |

Values are mean ± SD (n = 4). In each row, values followed by the same letter do not differ significantly at P<0.05.

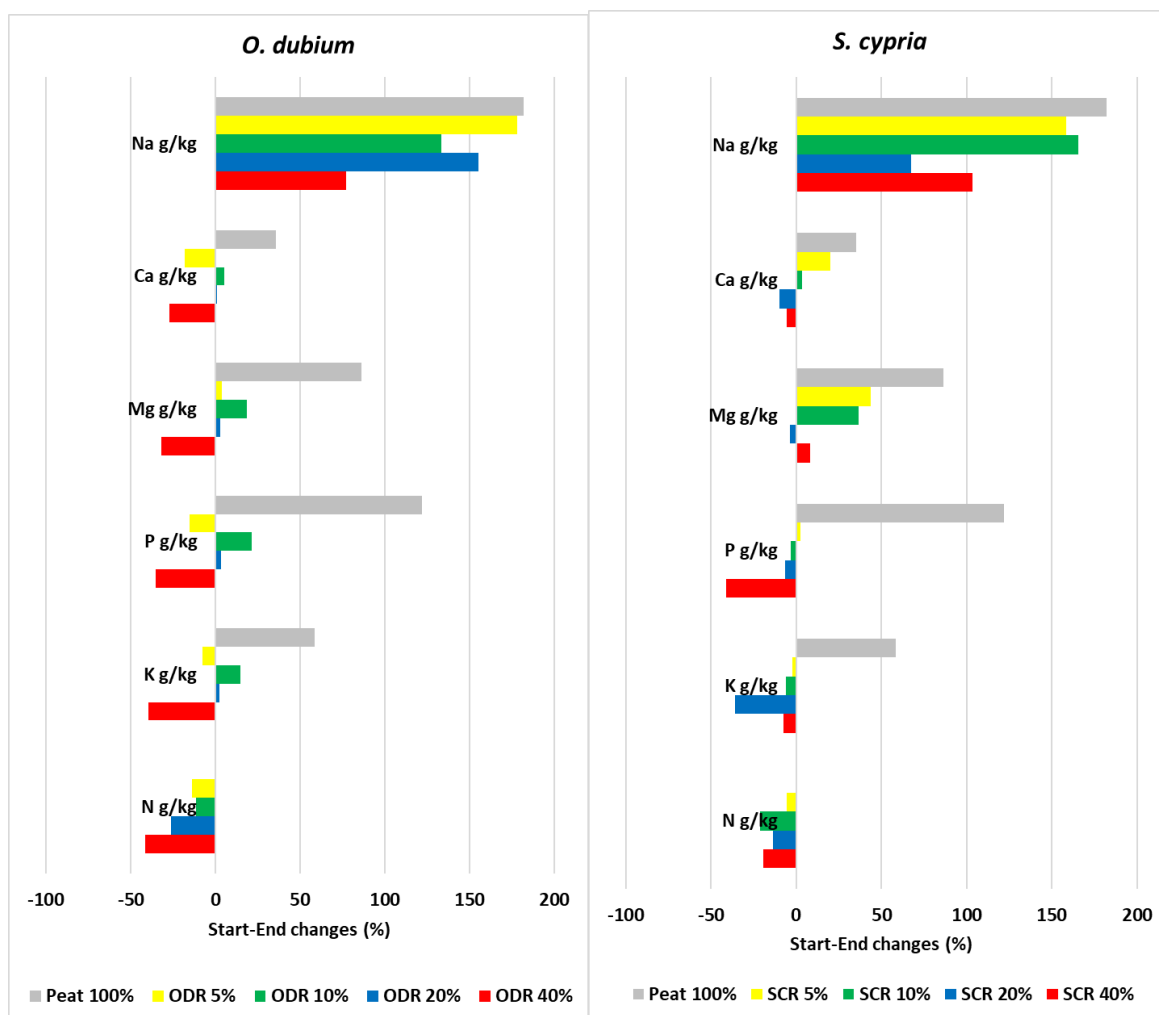

**Figure S1.** Growing media (Peat, *O. dubium* residue -ODR, *S. cypria* residue -SCR) mineral composition (% of changes from initial to final material) after plant harvesting (at the end of the growing period).
